# Supplementary material for: Expression pattern of olfactory receptor genes in human cumulus cells as an indicator for competent oocyte selection
Source: PubMed Central journal article supplement (PMC7759194; doi:10.3906/biy-2003-79), 2020-12-14
Supplement: turkjbio-44-371-sup001.pdf [file turkjbio-44-371-sup001.pdf]

## Supplementary data

**Table S1.** Characteristics of the primers used for qPCR.

| Gene          | Forward primer (5'-3')  | Reverse primer (5'-3')   | Product size (bp) | Annealing temperature (°C) |
|---------------|-------------------------|--------------------------|-------------------|----------------------------|
| <i>GAPDH</i>  | CTCATTTCCTGGTATGACAACGA | CTTCCTCTTGTGCTCTTGCT     | 122               | 60                         |
| <i>AC3</i>    | GGAACGTGTCTATGAGATGCGA  | TAGAAGTCAGCAAAGTTGGGCA   | 174               | 60                         |
| <i>OMP</i>    | AGGACTCGGATGCCATAGATTG  | GGAAGTACATGACCTTGCGGAT   | 96                | 60                         |
| <i>OR10J1</i> | CCCTGTGGTATACACCCTGAGA  | TGCCTAGTGTGGATGTTGACAG   | 123               | 60                         |
| <i>OR10H2</i> | ACCTTCCTCAGCACACTCTATTC | GGTGATGGTCATCCTCCTATCAT  | 87                | 60                         |
| <i>OR1D2</i>  | TACTCCTTTCCTTGTGTTGGGT  | TGCCATCCTCAGCAATACATACAT | 137               | 60                         |
| <i>OR51E1</i> | CTTATCGTCATCATCTCCGCCA  | TGTCAAGCCCAACACAGTCTTA   | 90                | 60                         |
| <i>OR51E2</i> | TGTGGTACTCGCCTTCTATGTG  | CACCCGTGTTCTGATCTGTTTG   | 172               | 60                         |
| <i>OR52D1</i> | TCCTGGTTTTCTACATCCCTGC  | TCCGAATCTCCTTGGTTCTAGC   | 162               | 60                         |

**Table S2.** Valid olfactory receptor genes according to NCBI. The following three steps were performed for all human ORs to determine the valid ones and limit the number of selected ORs for further evaluations: (1) The database of the GenBank site (<http://www.ncbi.nlm.nih.gov/genbank>) was searched for the name of related olfactory genes (2) In the search result, the mRNA sequence, was selected. (3) The OR was considered valid when the comment section of the result page began with the word "VALIDATED".

|                                                                  |                                                                  |
|------------------------------------------------------------------|------------------------------------------------------------------|
| <b>OR10A4:</b> Olfactory Receptor family 10 subfamily A member 4 | <b>OR4N2:</b> Olfactory Receptor family 4 subfamily N member 2   |
| <b>OR10D3:</b> Olfactory Receptor family 10 subfamily D member 3 | <b>OR4N4:</b> Olfactory Receptor family 4 subfamily N member 4   |
| <b>OR10G2:</b> Olfactory Receptor family 10 subfamily G member 2 | <b>OR4P4:</b> Olfactory Receptor family 4 subfamily P member 4   |
| <b>OR10G3:</b> Olfactory Receptor family 10 subfamily G member 3 | <b>OR4S2:</b> Olfactory Receptor family 4 subfamily S member 2   |
| <b>OR10H1:</b> Olfactory Receptor family 10 subfamily H member 1 | <b>OR51B4:</b> Olfactory Receptor family 51 subfamily B member 4 |
| <b>OR10H2:</b> Olfactory Receptor family 10 subfamily H member 2 | <b>OR51B5:</b> Olfactory Receptor family 51 subfamily B member 5 |
| <b>OR10H4:</b> Olfactory Receptor family 10 subfamily H member 4 | <b>OR51D1:</b> Olfactory Receptor family 51 subfamily D member 1 |
| <b>OR10J1:</b> Olfactory Receptor family 10 subfamily J member 1 | <b>OR51E1:</b> Olfactory Receptor family 51 subfamily E member 1 |
| <b>OR10Q1:</b> Olfactory Receptor family 10 subfamily Q member 1 | <b>OR51E2:</b> Olfactory Receptor family 51 subfamily E member 2 |
| <b>OR10W1:</b> Olfactory Receptor family 10 subfamily W member 1 | <b>OR51H1:</b> Olfactory Receptor family 51 subfamily H member 1 |
| <b>OR11A1:</b> Olfactory Receptor family 11 subfamily A member 1 | <b>OR51I1:</b> Olfactory Receptor family 51 subfamily I member 1 |
| <b>OR13A1:</b> Olfactory Receptor family 13 subfamily A member 1 | <b>OR51I2:</b> Olfactory Receptor family 51 subfamily I member 2 |
| <b>OR13H1:</b> Olfactory Receptor family 13 subfamily H member 1 | <b>OR51M1:</b> Olfactory Receptor family 51 subfamily M member 1 |
| <b>OR14A2:</b> Olfactory Receptor family 14 subfamily A member 2 | <b>OR51V1:</b> Olfactory Receptor family 51 subfamily V member 1 |
| <b>OR14K1:</b> Olfactory Receptor family 14 subfamily K member 1 | <b>OR52A1:</b> Olfactory Receptor family 52 subfamily A member 1 |
| <b>OR1A1:</b> Olfactory Receptor family 1 subfamily A member 1   | <b>OR52A5:</b> Olfactory Receptor family 52 subfamily A member 5 |
| <b>OR1A2:</b> Olfactory Receptor family 1 subfamily A member 2   | <b>OR52B6:</b> Olfactory Receptor family 52 subfamily B member 6 |
| <b>OR1C1:</b> Olfactory Receptor family 1 subfamily C member 1   | <b>OR52D1:</b> Olfactory Receptor family 52 subfamily D member 1 |
| <b>OR1D2:</b> Olfactory Receptor family 1 subfamily D member 2   | <b>OR52E2:</b> Olfactory Receptor family 52 subfamily E member 2 |
| <b>OR1D5:</b> Olfactory Receptor family 1 subfamily D member 5   | <b>OR52E5:</b> Olfactory Receptor family 52 subfamily E member 5 |
| <b>OR1E1:</b> Olfactory Receptor family 1 subfamily E member 1   | <b>OR52I1:</b> Olfactory Receptor family 52 subfamily I member 1 |
| <b>OR1E2:</b> Olfactory Receptor family 1 subfamily E member 2   | <b>OR52I2:</b> Olfactory Receptor family 52 subfamily I member 2 |
| <b>OR1L1:</b> Olfactory Receptor family 1 subfamily L member 1   | <b>OR52J3:</b> Olfactory Receptor family 52 subfamily J member 3 |
| <b>OR1L6:</b> Olfactory Receptor family 1 subfamily L member 6   | <b>OR52K1:</b> Olfactory Receptor family 52 subfamily K member 1 |
| <b>OR2A2:</b> Olfactory Receptor family 2 subfamily A member 2   | <b>OR52K2:</b> Olfactory Receptor family 52 subfamily K member 2 |
| <b>OR2A4:</b> Olfactory Receptor family 2 subfamily A member 4   | <b>OR52L1:</b> Olfactory Receptor family 52 subfamily L member 1 |
| <b>OR2AP1:</b> Olfactory Receptor family 2 subfamily AP member 1 | <b>OR52M1:</b> Olfactory Receptor family 52 subfamily M member 1 |
| <b>OR2B2:</b> Olfactory Receptor family 2 subfamily B member 2   | <b>OR52N5:</b> Olfactory Receptor family 52 subfamily N member 5 |
| <b>OR2B3:</b> Olfactory Receptor family 2 subfamily B member 3   | <b>OR56A1:</b> Olfactory Receptor family 56 subfamily A member 1 |
| <b>OR2B6:</b> Olfactory Receptor family 2 subfamily B member 6   | <b>OR56A5:</b> Olfactory Receptor family 56 subfamily A member 5 |
| <b>OR2C1:</b> Olfactory Receptor family 2 subfamily C member 1   | <b>OR56B1:</b> Olfactory Receptor family 56 subfamily B member 1 |
| <b>OR2C3:</b> Olfactory Receptor family 2 subfamily C member 3   | <b>OR5B12:</b> Olfactory Receptor family 5 subfamily B member 12 |
| <b>OR2G6:</b> Olfactory Receptor family 2 subfamily G member 6   | <b>OR5B17:</b> Olfactory Receptor family 5 subfamily B member 17 |
| <b>OR2H1:</b> Olfactory Receptor family 2 subfamily H member 1   | <b>OR5B2:</b> Olfactory Receptor family 5 subfamily B member 2   |
| <b>OR2J2:</b> Olfactory Receptor family 2 subfamily J member 2   | <b>OR5B3:</b> Olfactory Receptor family 5 subfamily B member 3   |
| <b>OR2L13:</b> Olfactory Receptor family 2 subfamily L member 13 | <b>OR5M3:</b> Olfactory Receptor family 5 subfamily M member 3   |
| <b>OR2L5:</b> Olfactory Receptor family 2 subfamily L member 5   | <b>OR5V1:</b> Olfactory Receptor family 5 subfamily V member 1   |
| <b>OR2T8:</b> Olfactory Receptor family 2 subfamily T member 8   | <b>OR6C68:</b> Olfactory Receptor family 6 subfamily C member 68 |
| <b>OR2V1:</b> Olfactory Receptor family 2 subfamily V member 1   | <b>OR6K3:</b> Olfactory Receptor family 6 subfamily K member 3   |
| <b>OR2W1:</b> Olfactory Receptor family 2 subfamily W member 1   | <b>OR6P1:</b> Olfactory Receptor family 6 subfamily P member 1   |
| <b>OR3A1:</b> Olfactory Receptor family 3 subfamily A member 1   | <b>OR7A5:</b> Olfactory Receptor family 7 subfamily A member 5   |
| <b>OR3A2:</b> Olfactory Receptor family 3 subfamily A member 2   | <b>OR7C1:</b> Olfactory Receptor family 7 subfamily C member 1   |
| <b>OR3A3:</b> Olfactory Receptor family 3 subfamily A member 3   | <b>OR7D2:</b> Olfactory Receptor family 7 subfamily D member 2   |
| <b>OR4A47:</b> Olfactory Receptor family 4 subfamily A member 47 | <b>OR8J1:</b> Olfactory Receptor family 8 subfamily J member 1   |
| <b>OR4A5:</b> Olfactory Receptor family 4 subfamily A member 5   | <b>OR8K5:</b> Olfactory Receptor family 8 subfamily K member 5   |
| <b>OR4C11:</b> Olfactory Receptor family 4 subfamily C member 11 | <b>OR8S1:</b> Olfactory Receptor family 8 subfamily S member 1   |
| <b>OR4C13:</b> Olfactory Receptor family 4 subfamily C member 13 | <b>OR8U8:</b> Olfactory Receptor family 8 subfamily U member 8   |
| <b>OR4E2:</b> Olfactory Receptor family 4 subfamily E member 2   | <b>OR9G9:</b> Olfactory Receptor family 9 subfamily G member 9   |
| <b>OR4F29:</b> Olfactory Receptor family 4 subfamily F member 29 | <b>OR9Q1:</b> Olfactory Receptor family 9 subfamily Q member 1   |
| <b>OR4K1:</b> Olfactory Receptor family 4 subfamily K member 1   | <b>OR9Q2:</b> Olfactory Receptor family 9 subfamily Q member 2   |
| <b>OR4M2:</b> Olfactory Receptor family 4 subfamily M member 2   |                                                                  |

**Table S3.** Selected olfactory receptors: common and valid ORs. Among the valid ORs expressed in human cumulus cells, only the commonly expressed ORs were selected from GEO datasets to limit the number of genes for further analyses.

|               |                                                   |
|---------------|---------------------------------------------------|
| <b>OR10A4</b> | Olfactory Receptor family 10 subfamily A member 4 |
| <b>OR10D3</b> | Olfactory Receptor family 10 subfamily D member 3 |
| <b>OR10H1</b> | Olfactory Receptor family 10 subfamily H member 1 |
| <b>OR10H2</b> | Olfactory Receptor family 10 subfamily H member 2 |
| <b>OR10J1</b> | Olfactory Receptor family 10 subfamily J member 1 |
| <b>OR1A1</b>  | Olfactory Receptor family 1 subfamily A member 1  |
| <b>OR1A2</b>  | Olfactory Receptor family 1 subfamily A member 2  |
| <b>OR1C1</b>  | Olfactory Receptor family 1 subfamily C member 1  |
| <b>OR1D2</b>  | Olfactory Receptor family 1 subfamily D member 2  |
| <b>OR1D5</b>  | Olfactory Receptor family 1 subfamily D member 5  |
| <b>OR1E1</b>  | Olfactory Receptor family 1 subfamily E member 1  |
| <b>OR1E2</b>  | Olfactory Receptor family 1 subfamily E member 2  |
| <b>OR2B2</b>  | Olfactory Receptor family 2 subfamily B member 2  |
| <b>OR2B6</b>  | Olfactory Receptor family 2 subfamily B member 6  |
| <b>OR2C1</b>  | Olfactory Receptor family 2 subfamily C member 1  |
| <b>OR2C3</b>  | Olfactory Receptor family 2 subfamily C member 3  |
| <b>OR2L13</b> | Olfactory Receptor family 2 subfamily L member 13 |
| <b>OR3A1</b>  | Olfactory Receptor family 3 subfamily A member 1  |
| <b>OR3A3</b>  | Olfactory Receptor family 3 subfamily A member 3  |
| <b>OR51B4</b> | Olfactory Receptor family 51 subfamily B member 4 |
| <b>OR51B5</b> | Olfactory Receptor family 51 subfamily B member 5 |
| <b>OR51E1</b> | Olfactory Receptor family 51 subfamily E member 1 |
| <b>OR51E2</b> | Olfactory Receptor family 51 subfamily E member 2 |
| <b>OR51I1</b> | Olfactory Receptor family 51 subfamily I member 1 |
| <b>OR51I2</b> | Olfactory Receptor family 51 subfamily I member 2 |
| <b>OR51M1</b> | Olfactory Receptor family 51 subfamily M member 1 |
| <b>OR52A1</b> | Olfactory Receptor family 52 subfamily A member 1 |
| <b>OR52D1</b> | Olfactory Receptor family 52 subfamily D member 1 |
| <b>OR7A5</b>  | Olfactory Receptor family 7 subfamily A member 5  |
| <b>OR7C1</b>  | Olfactory Receptor family 7 subfamily C member 1  |
| <b>OR7D2</b>  | Olfactory Receptor family 7 subfamily D member 2  |

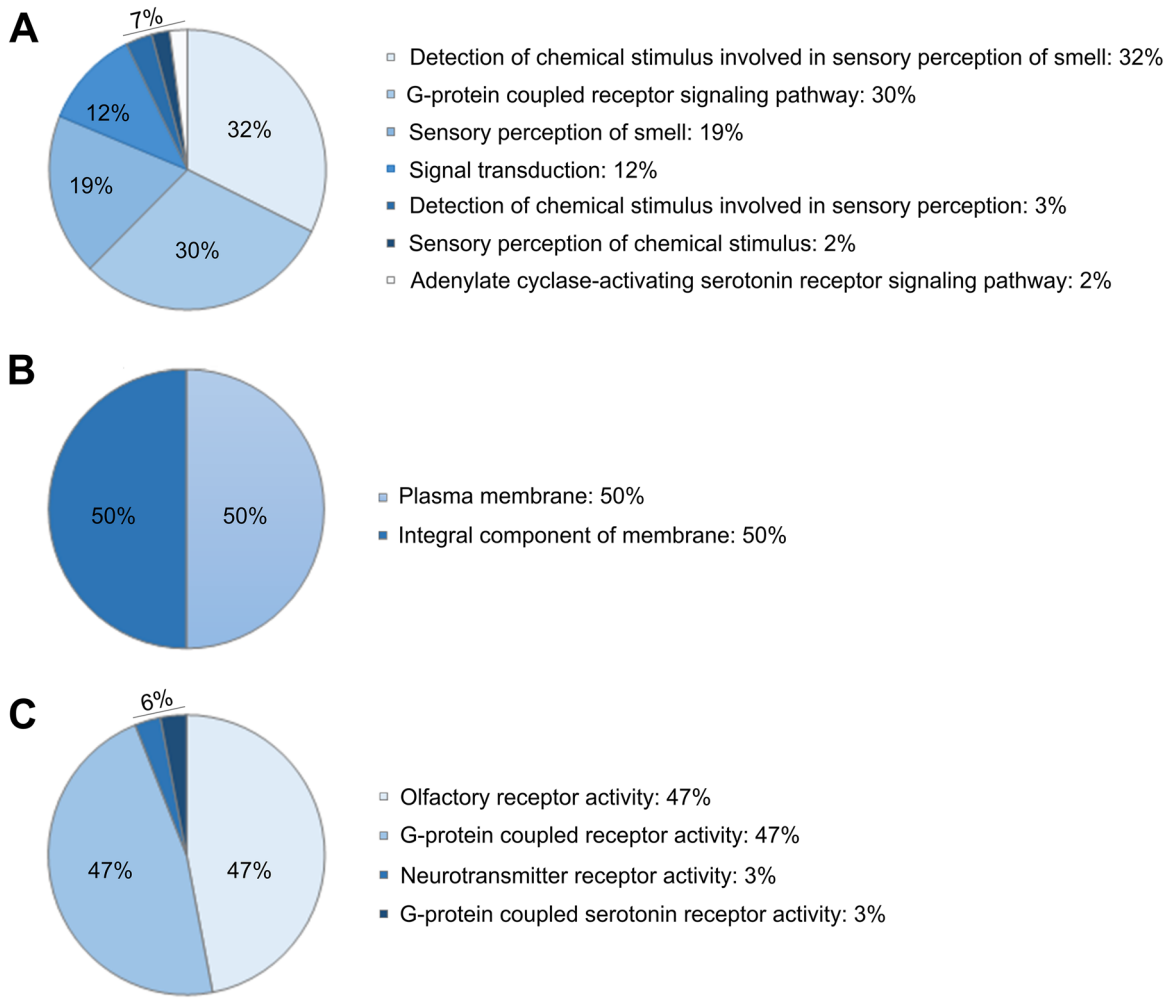

**Figure S1.** Gene ontology (GO) of common and valid olfactory receptors in cumulus cells. Gene ontology enrichment was performed for comprehensive analysis of selected ORs. Our GO results confirmed OR10H2 function as a serotonin receptor. (A) Top enriched GO terms in the biological process class; (B) Top enriched GO terms in the cellular component class; (C) Top enriched GO terms in the molecular function class, which are selected according to P-value  $\leq 0.05$ .
